# Supplementary material
Source: PubMed Central journal article supplement (PMC5970998)

**FIGURE S1.** Ten GFR/proteinuria risk stage models generated from 90% subsamples of N=1169 children for model cross-validation. Cell coloring defines the final GFR/proteinuria risk stages ordered from best prognosis to worst prognosis as follows: A'(olive green), A (dark green), B (light green), C (gold), D (tan), E (salmon), F (red).

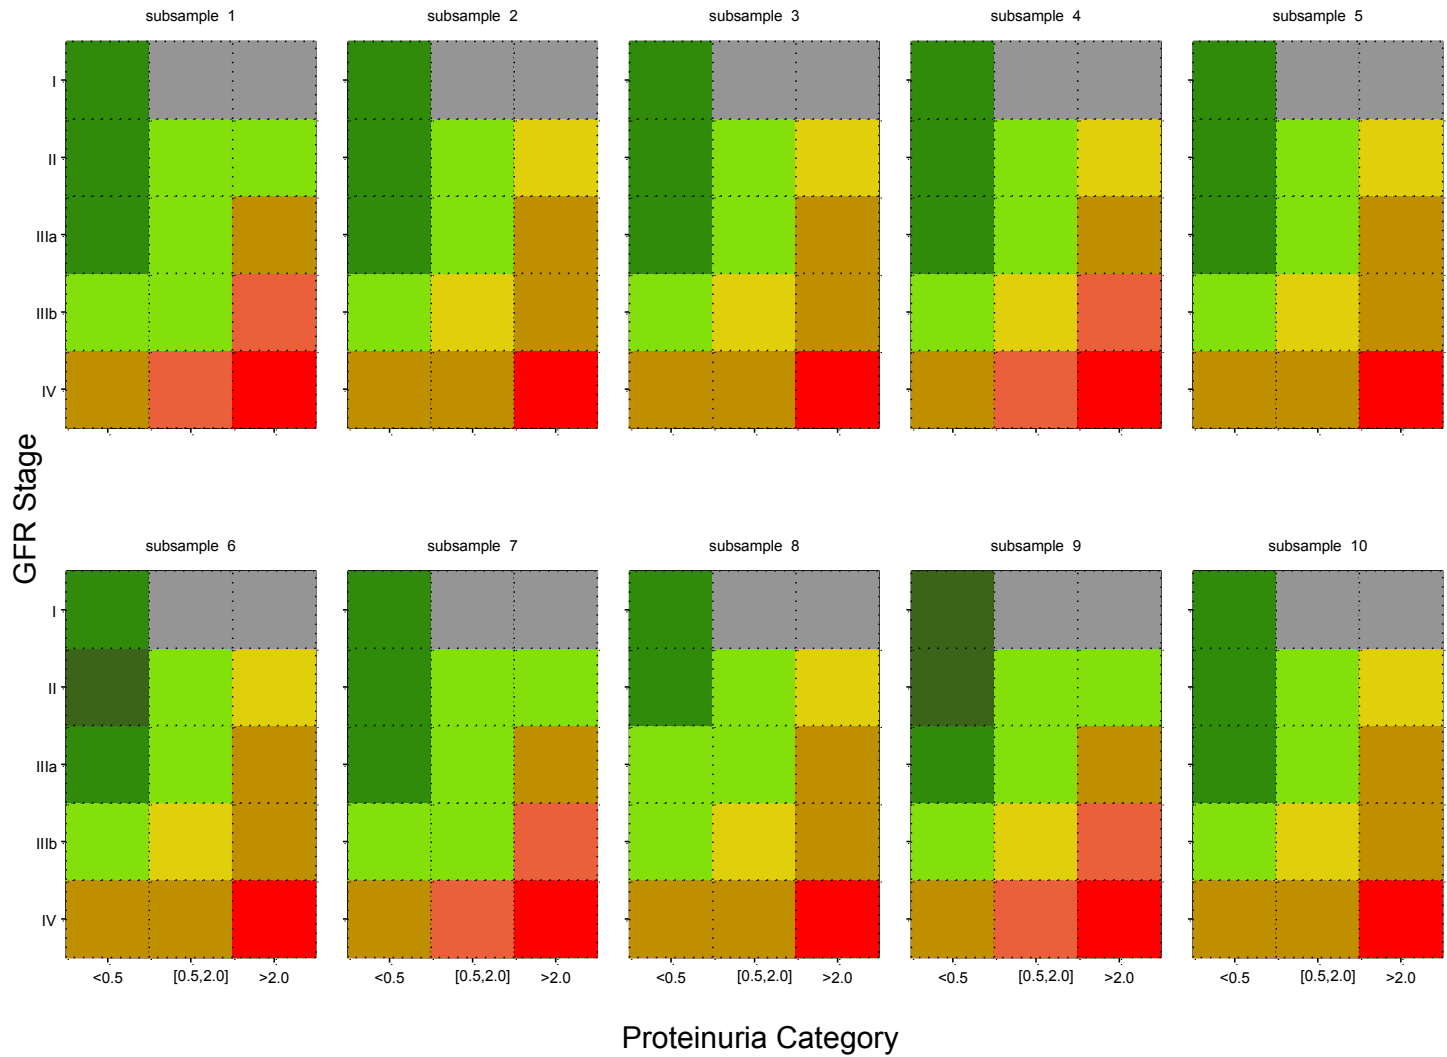

Supplement: NIHMS958292-supplement-1.pdf [file NIHMS958292-supplement-1.pdf]
