# Supplementary material
Source: PubMed Central journal article supplement (PMC5970998)
Supplement: NIHMS958292-supplement-2.pdf [file NIHMS958292-supplement-2.pdf]

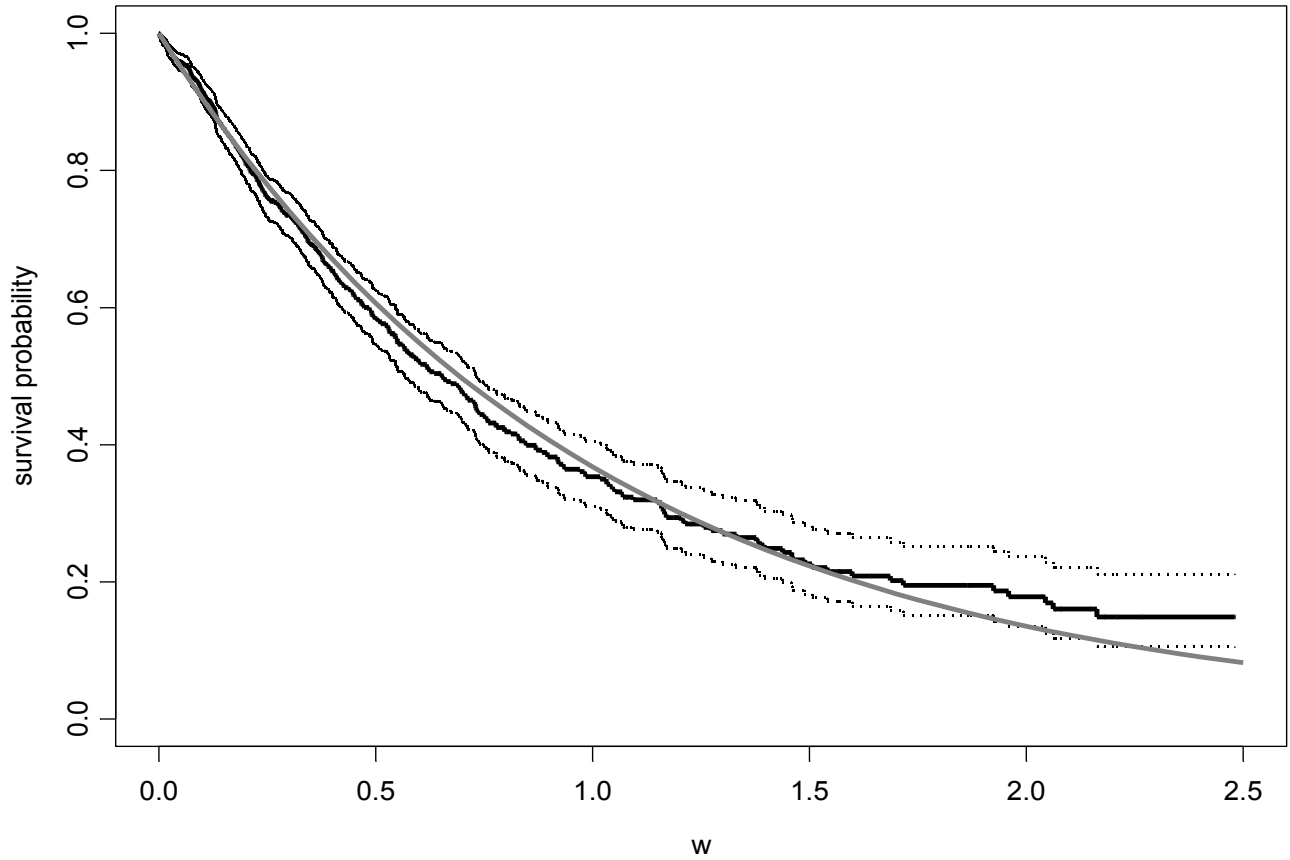

**FIGURE S2.** Results of cross-validation analysis. This figure shows the standardized times,  $w_i$ , (shown collectively as the solid black step curve with 95% confidence intervals as dashed lines) derived from cross-validation and superimposed on the survival function of the standard lognormal  $LN[0,1]$  (gray curve).
